# Supplementary material for: Advancing Mycotoxin Detection: Multivariate Rapid Analysis on Corn Using Surface Enhanced Raman Spectroscopy (SERS)
Source: MDPI journal article supplement (doi:10.3390/toxins15100610), 2023-10-12
Supplement: s1 [file s1]

## Supplementary Information

The supplementary materials presented here provide details of some of the additional data that was collected to enhance the development of the analytical method developed to detect mycotoxins.

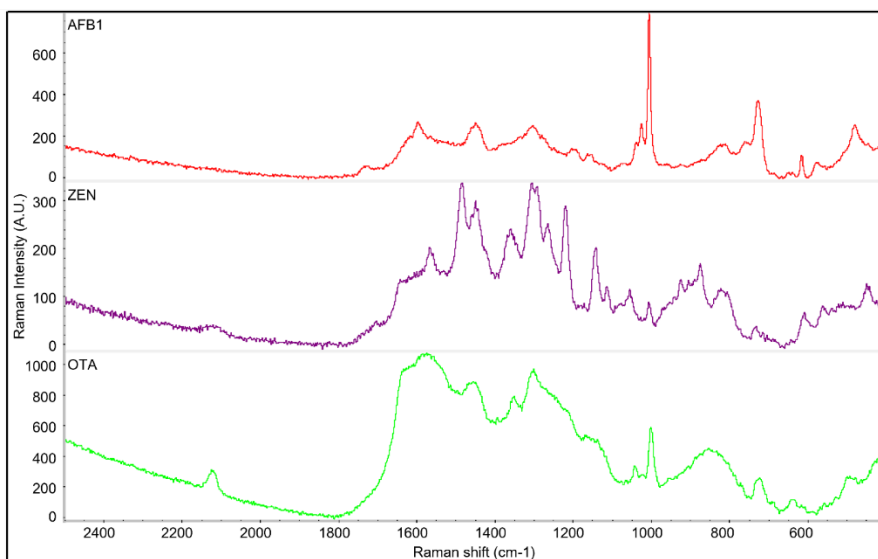

**Figure S1.** Raw SERS spectra of aflatoxin B1 (AFB1), zearalenone (ZEN), and ochratoxin A (OTA).

**Table S1.** Summary of mycotoxin concentration cocktail that was applied onto corn.

| Variable | Mycotoxin Concentration (ppm) |      |      |
|----------|-------------------------------|------|------|
|          | AFB1                          | ZEN  | OTA  |
| T1       | 0.00                          | 0.00 | 0.00 |
| T2       | 1.00                          | 1.00 | 1.00 |
| T3       | 0.75                          | 0.75 | 1.50 |
| T4       | 0.75                          | 1.50 | 0.75 |
| T5       | 1.50                          | 0.75 | 0.75 |
| T6       | 1.20                          | 1.20 | 0.60 |

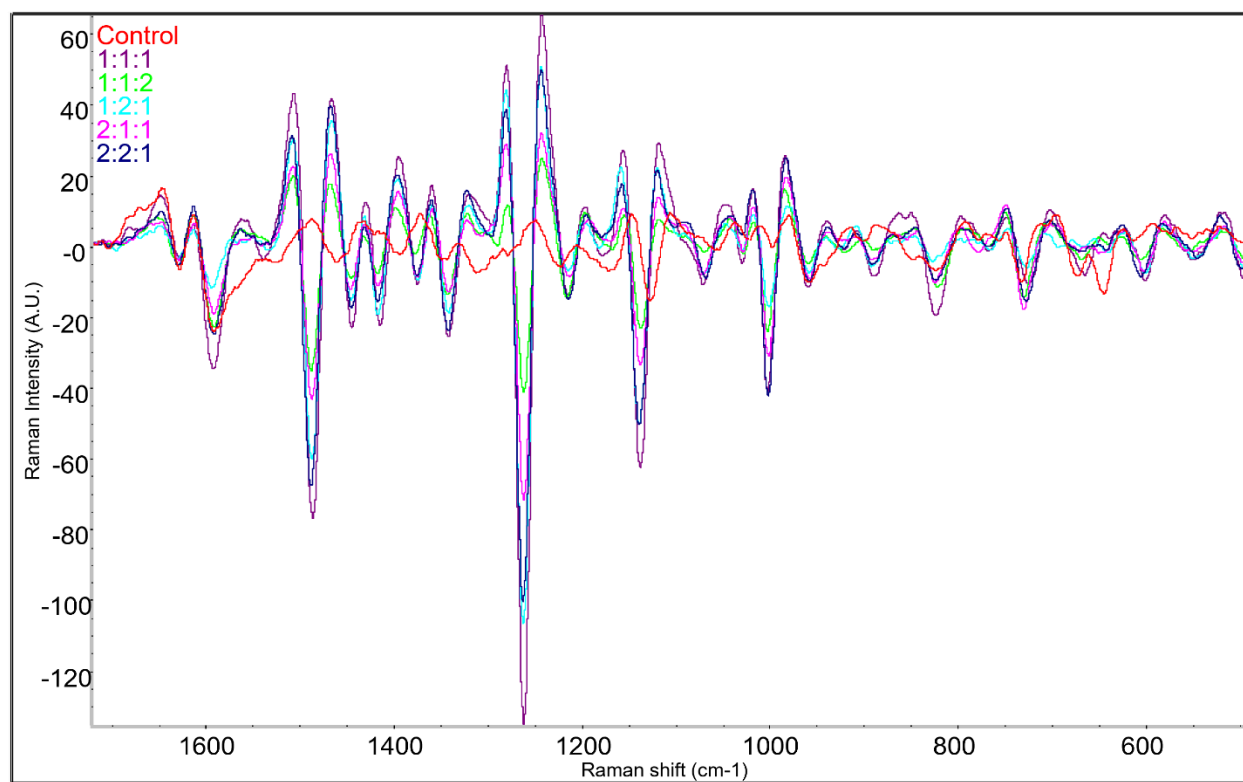

**Figure S2.** Overlaid second derivative Raman spectra of three mycotoxins spiked on corn at different concentration ratios in the following order – AFB1:ZEN:OTA.

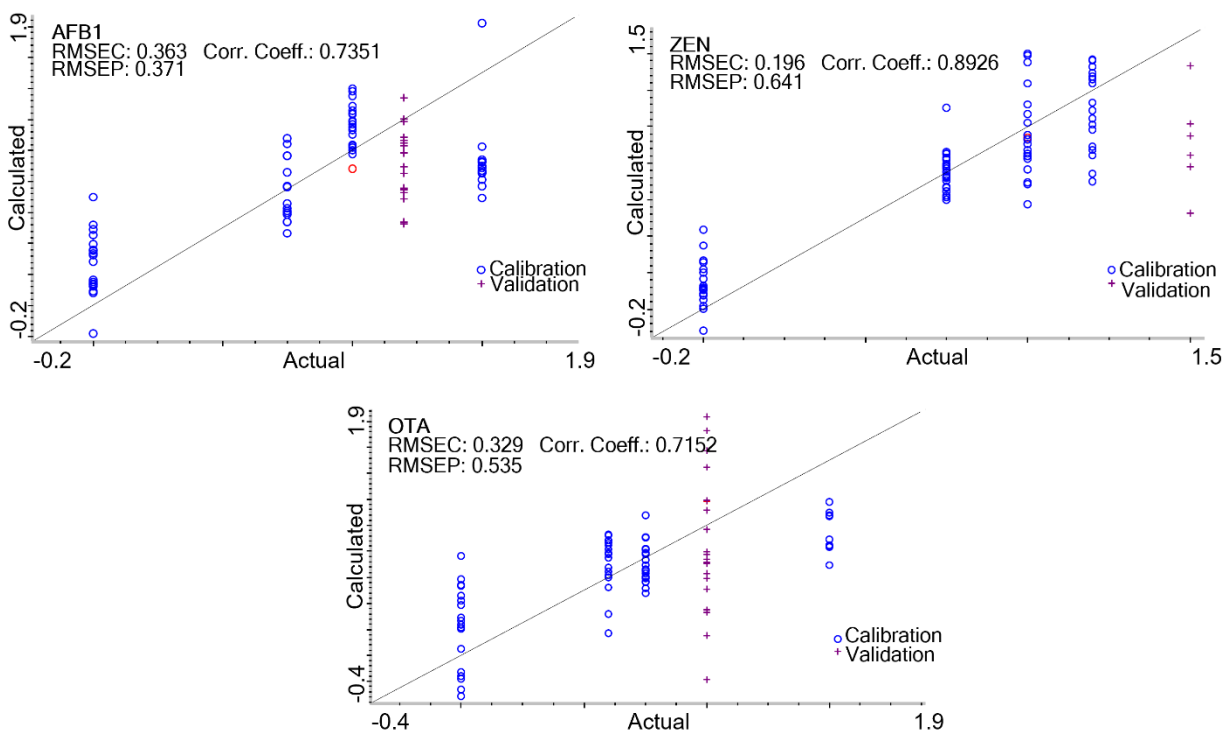

**Figure S3.** Partial Least Squares Regression curve of AFB1, ZEN and OTA using SERS spectra obtained from corn spiked with the three mycotoxins.
